23 An acute viral pneumonia (COVID-19), caused by the novel coronavirus HCoV-19,  
24 was first identified during December 2019 in China(1). HCoV-19 was found to be  
25 highly transmissible in humans(2) and is now a pandemic, with transmission into over  
26 140 countries, causing over 150,000 infections and 6,000 deaths as of March 15, 2020  
27 (3).

28

29 Diagnosis is critical for confirmation and treatment of COVID-19. Viral RNA  
30 detection for the respiratory samples is currently the primary criteria for diagnosis of  
31 COVID-19. Two studies on virus loads in clinical samples have been recently  
32 reported, in which viral loads in nasal and throat swabs and sputum specimens peaked  
33 at three to seven days after illness onset (d.a.o.) and virtually disappeared before 15  
34 d.a.o.(4, 5). Another study showed that the median duration of virus shedding in throat  
35 swabs was 20 d.a.o. in survivors and was detectable until death in non-survivors(6).  
36 Additionally, live viruses have been isolated in the feces and urine samples of  
37 COVID-19 patients. However, the viral dynamics in these two types of specimens  
38 have not yet been elucidated, as well as comparative studies on virus shedding in the  
39 upper respiratory, intestinal and urinary tracts.

40

41 From January 20 to February 23, 2020, a total of 23 patients were treated in a  
42 designated hospital in Beijing (11 were imported, 12 were secondary cases; two  
43 family clusters; 12 men, 11 women; median age was 48.0 years (IQR 40.0 to 62.0);  
44 two with severe disease, the others were mild-to-moderate, all patients recovered

45 except for one due to an unrelated bacterial infection) (Table S1 in the Supplementary  
46 appendix). Upper respiratory (nasal-throat mixed) swabs (n= 66), feces (n= 51), urine  
47 (n= 56), and plasma (n= 56) samples were collected for viral RNA detection by  
48 real-time RT-PCR (rRT-PCR). The study was approved by the Ethics Committees of  
49 Chinese Academy of Sciences (SQIMCAS20). Informed consent was obtained from  
50 all subjects for being included in the study, and all patient data were anonymized  
51 before study inclusion.

52

53 The plasma and urine samples were all negative, except for urine samples from two  
54 severe cases at the latest available detection point (16 or 21 d.a.o). Conversely, virus  
55 was shed in respiratory swabs and feces samples during the diseased period (Figure  
56 1A). Ten of 12 cases (83.3%) were positive for feces samples, while 14 of 21 cases  
57 (66.7%) were positive for respiratory samples. In addition, all samples from one  
58 severe patient were negative until 21 d.a.o., when feces samples were positive. The  
59 median duration of virus shedding was 10.0 days (IQR 8.0 to 17.0) in nasal-throat  
60 mixed swabs, but was 22.0 days (IQR 15.5 to 23.5) for the feces (Figure 1 B). The  
61 viral titers of nasal-throat swabs peaked at six to nine d.a.o. and at 14-18 d.a.o for  
62 fecal samples, and the highest virus titers at the peak was significantly higher for  
63 feces ( $10^{5.8}$  copies/ml, mean 5623 copies/ml) than of respiratory samples ( $10^{6.3}$   
64 copies/ml, mean 2535 copies/ml) (Figure 1A). Notably, at 26 days after discharge,  
65 case 3 was detected positive again in feces samples, but appears to be healthy and  
66 negative for respiratory swabs. These results indicated that beside respiratory samples,

67 intestinal samples (e.g. feces) should be recommended for diagnosis of COVID-19,  
68 especially for monitoring the relapse of discharged patients.

69

70 We declare no competing interests. This work was supported by the Strategic Priority  
71 Research Program of the Chinese Academy of Sciences (CAS) (Grant No.  
72 XDB29010102). Y.B. is supported by the NSFC Outstanding Young Scholars (Grant  
73 No. 31822055), and Youth Innovation Promotion Association of CAS (Grant No.  
74 2017122). We declare no competing interests.

75

76

## 77 **References**

- 78 1. Zhu N, Zhang D, Wang W, Li X, Yang B, Song J, et al. A Novel Coronavirus from Patients with  
79 Pneumonia in China, 2019. *N Engl J Med.* 2020;382(8):727-33.
- 80 2. Wang C, Horby PW, Hayden FG, Gao GF. A novel coronavirus outbreak of global health concern.  
81 *Lancet.* 2020;395(10223):470-3.
- 82 3. World Health Organization (2020). Coronavirus disease (COVID-19) outbreak.  
83 <https://www.who.int/emergencies/diseases/novel-coronavirus-2019>.
- 84 4. Pan Y, Zhang D, Yang P, Poon LLM, Wang Q. Viral load of SARS-CoV-2 in clinical samples. *Lancet*  
85 *Infect Dis.* 2020.
- 86 5. Zou L, Ruan F, Huang M, Liang L, Huang H, Hong Z, et al. SARS-CoV-2 Viral Load in Upper  
87 Respiratory Specimens of Infected Patients. *N Engl J Med.* 2020.
- 88 6. Zhou F, YT, Du R., Fan G., Liu Y., Liu Z.\*, Xiang J., Wang Y., Song B., Gu X., Guan L., Wei Y., Li H., Wu  
89 X., Xu J., Tu S., Zhang Y., Chen H., Cao B. Clinical course and risk factors for mortality of adult inpatients  
90 with COVID-19 in Wuhan, China: a retrospective cohort study. *Lancet.* 2020.

91

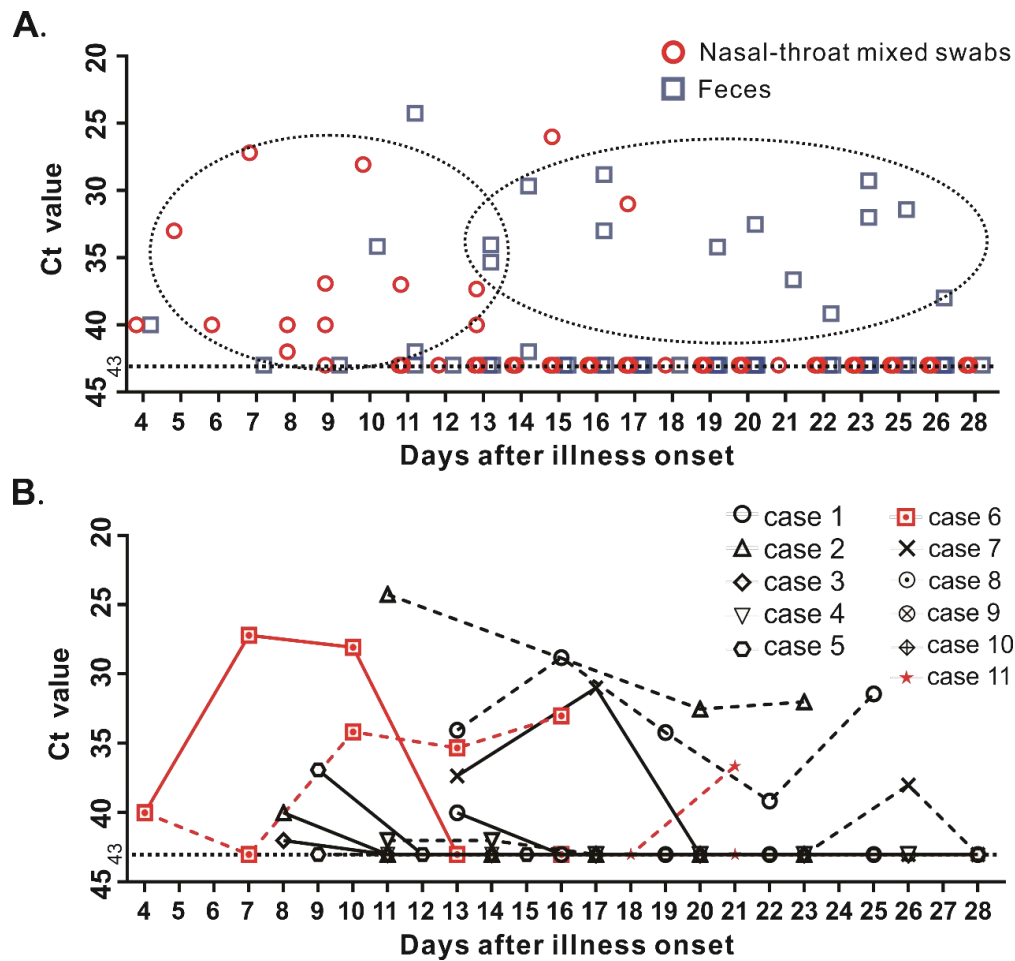

92

93 **Figure 1. Virus dynamics in nasopharyngeal and fecal specimens of COVID-19 cases**

94 The nasal-throat mixed swabs and fecal samples of all 23 cases were detected by rRT-PCR targeting

95 ORF1ab, N and S genes (Mabsky Biotech Co., Ltd., CONFORMITE EUROPEENNE NO.), the Ct

96 values of ORF1ab gene were shown in (A). Sequential nasal-throat mixed swabs, feces, urine, and

97 plasma samples were collected in 11 cases and used for virus detection. The Ct values of nasal-throat

98 mixed swabs (solid line) and feces (dotted line) specimens were shown in (B). Two cases with severe

99 diseases, identified according to the guideline of HCoV-19 infection from the National Health

100 Commission of the People's Republic of China, were colored in red. The other eight cases with

101 mild-to-moderate symptoms were in black. Ct values were inversely related to viral RNA copy number,

102 with Ct values of 37.6, 32.64, 29.22, and 25.77 corresponding to  $1 \times 10^3$ ,  $1 \times 10^4$ ,  $1 \times 10^5$ , and  $1 \times 10^6$  copies

103 per mL. Negative samples were denoted with a Ct value of 43, which was the limit of detection.

104

105

106

107

108

109

110
